# Supplementary material
Source: PubMed Central journal article supplement (PMC3568535)

# Suppl. Figure 1:

## A

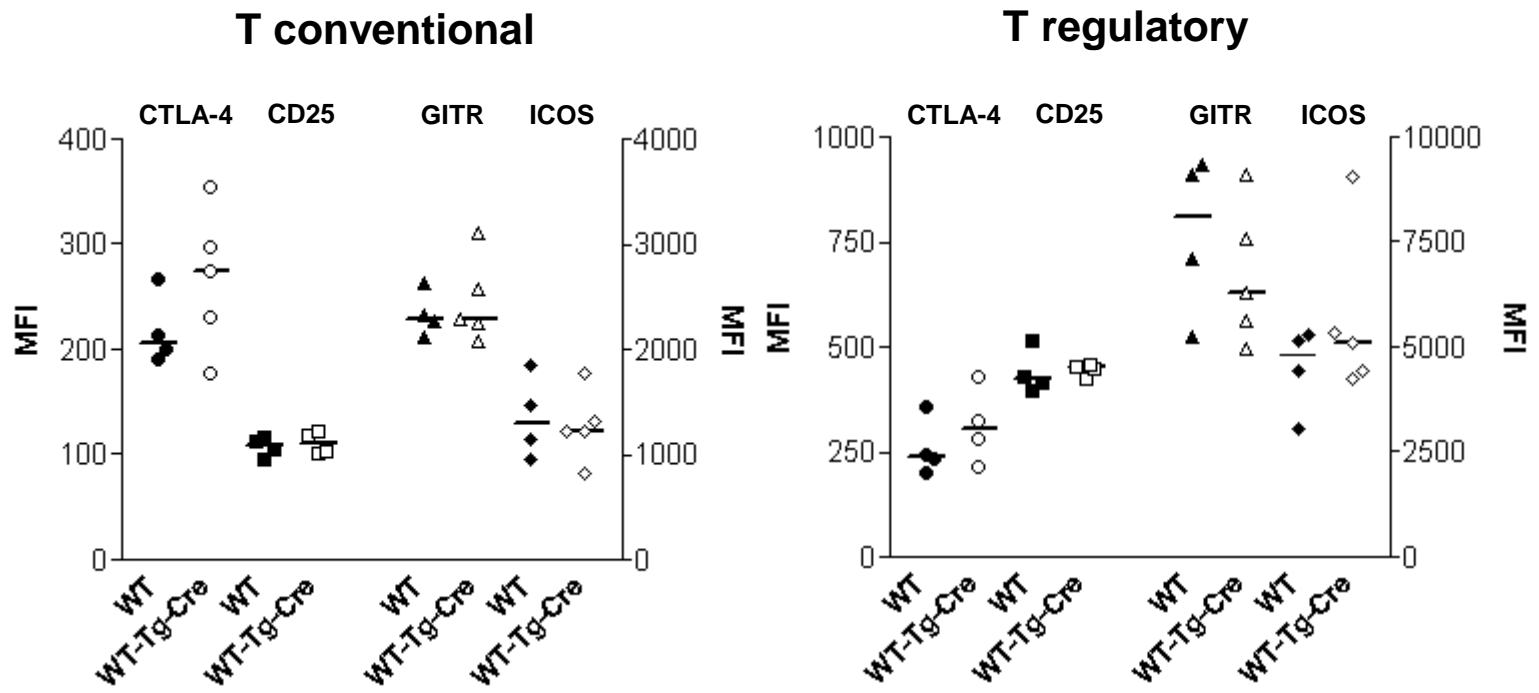

## B

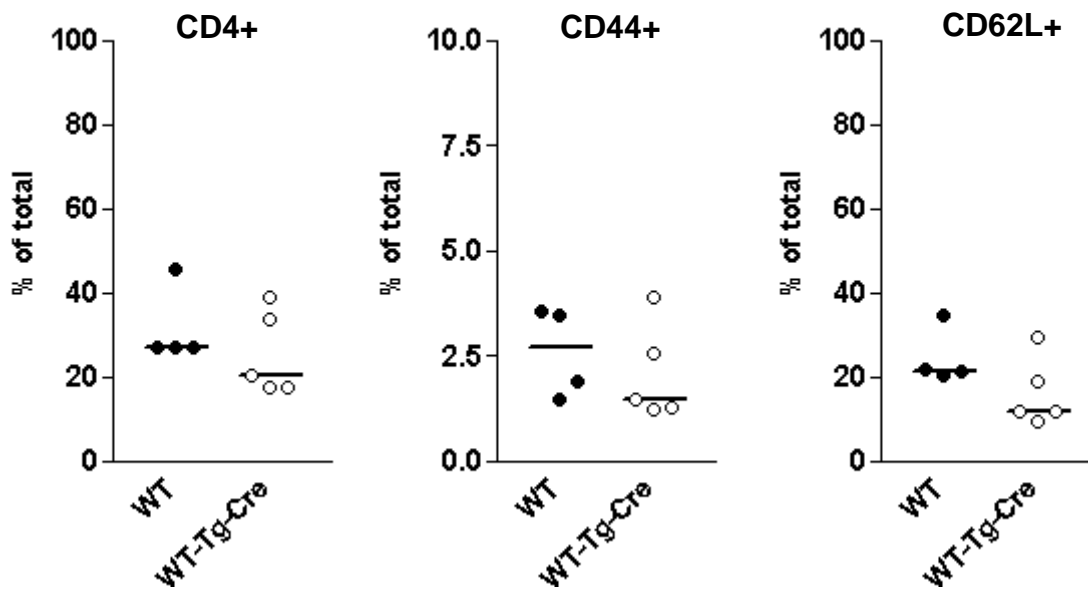

# Suppl. Figure 2:

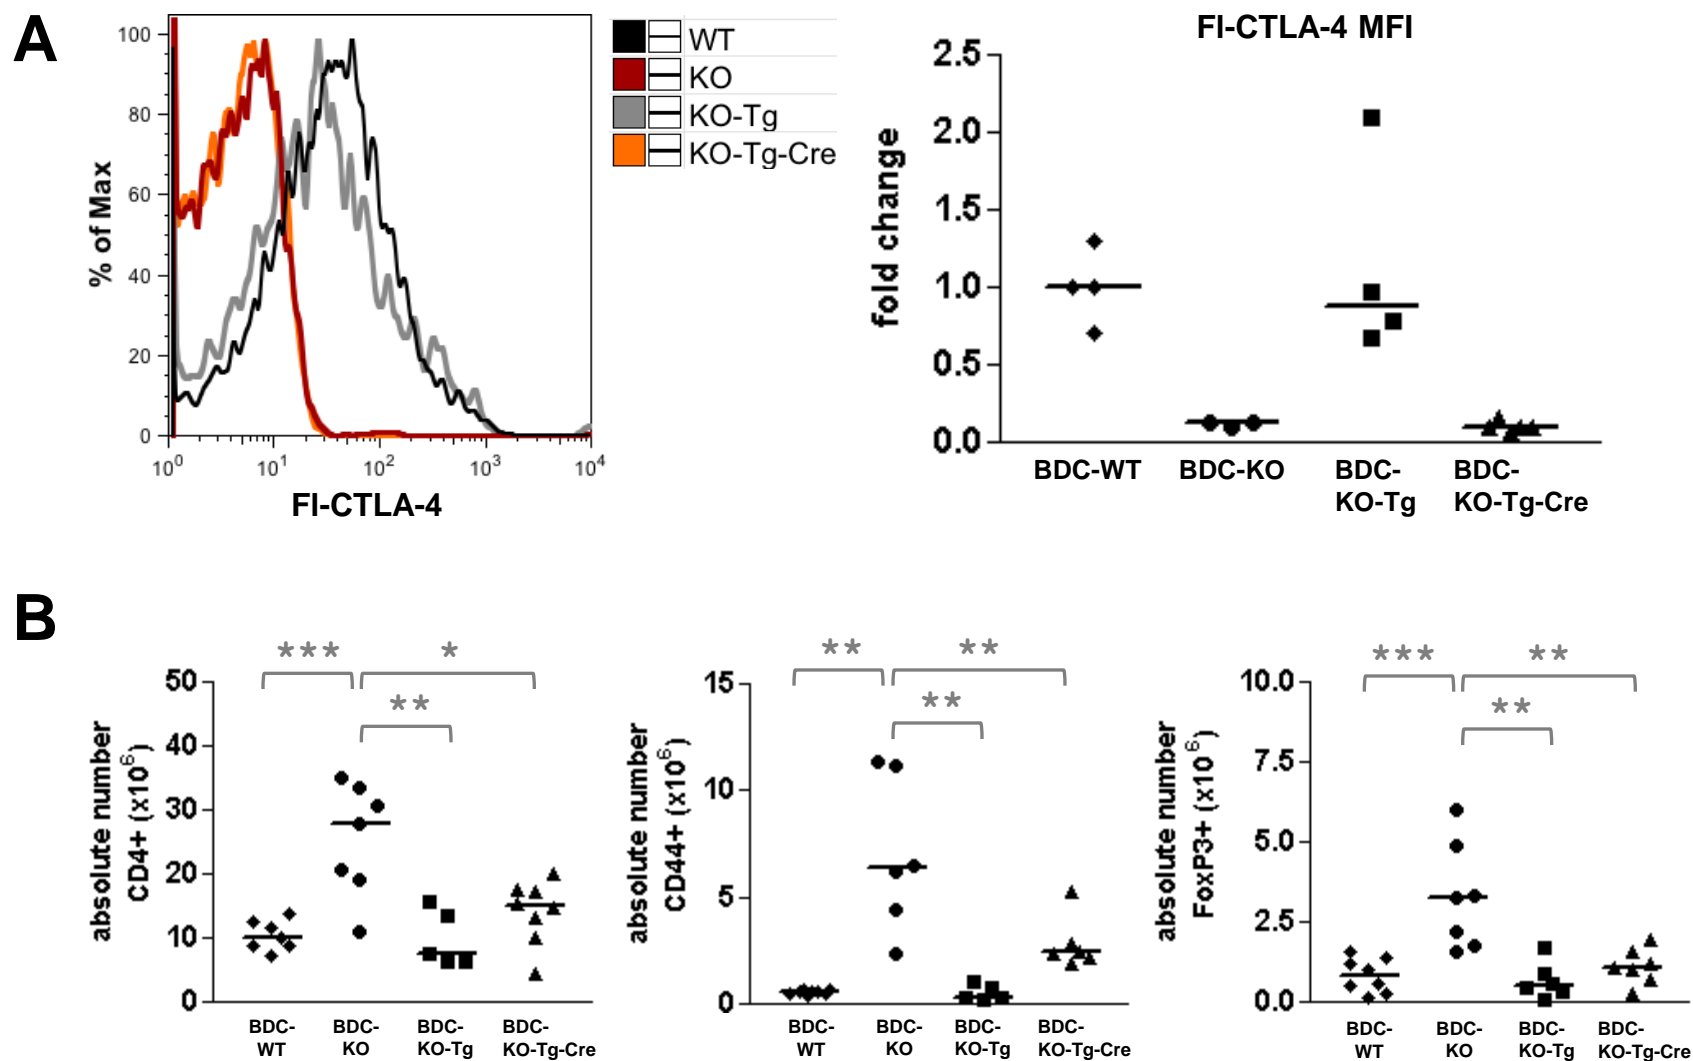

# Suppl. Figure 3:

## A

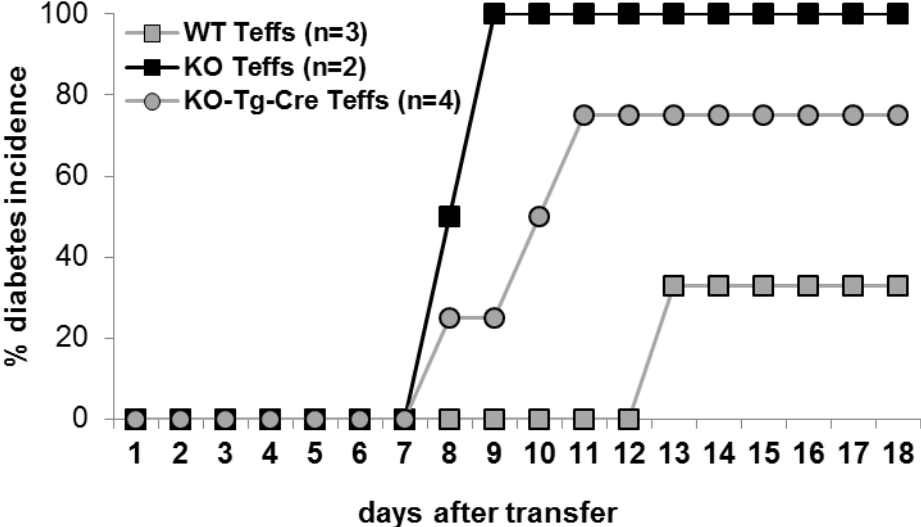

## B

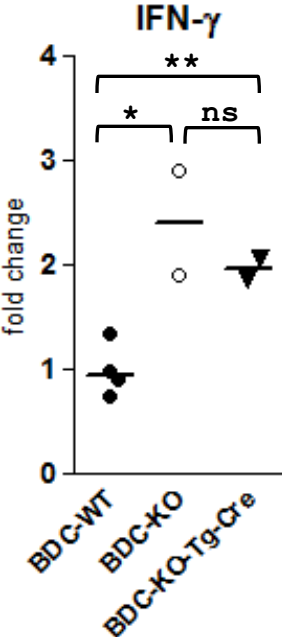

Supplement: NIHMS429398-supplement-1.pdf [file NIHMS429398-supplement-1.pdf]
